# Supplementary material for: Integrated Wastewater Management for the Protection of Vulnerable Water Resources in the North of Jordan
Source: MDPI journal article supplement (doi:10.3390/su14063574), 2022-03-18
Supplement: s1 [file s1]

# Supplementary Materials

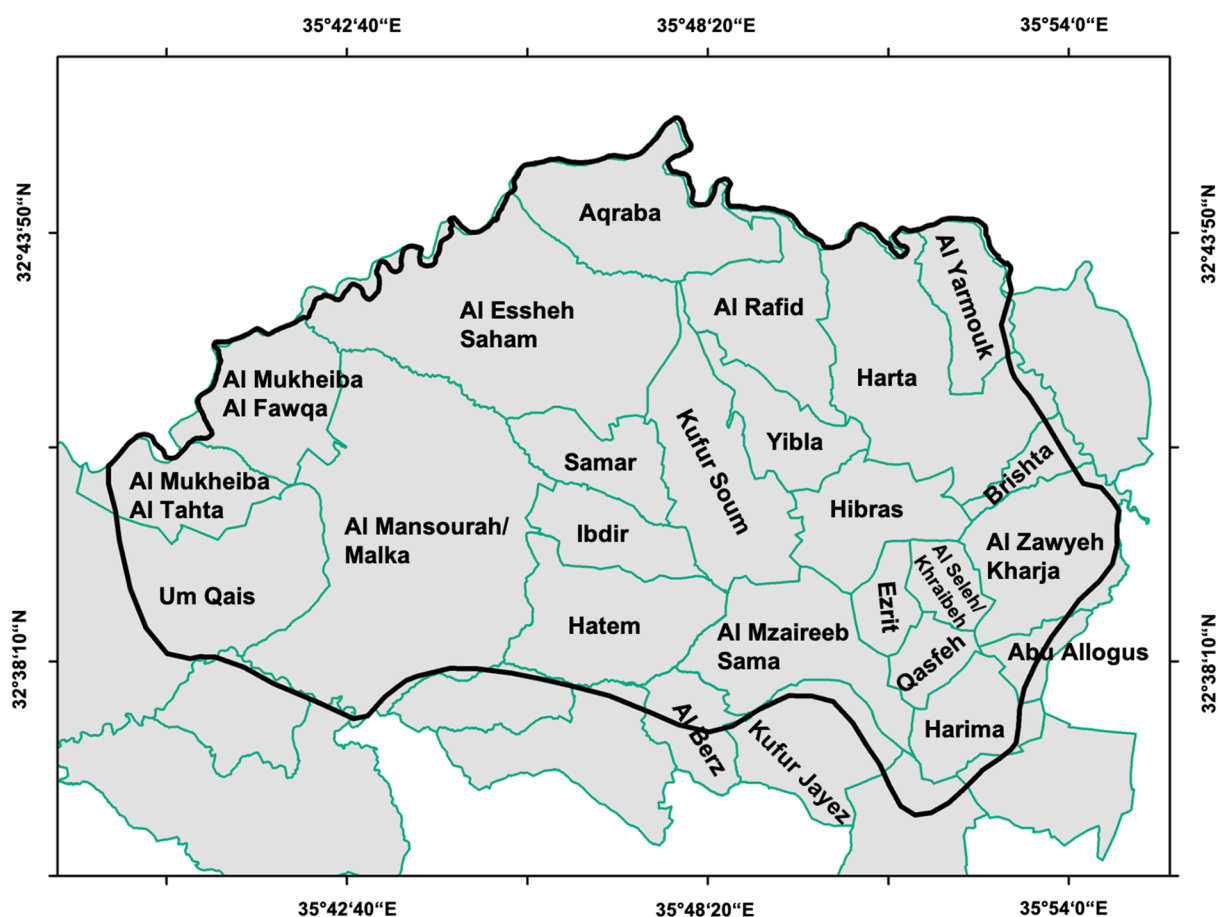

Figure S1. The 25 sub-districts of the district of Bani Kinana.

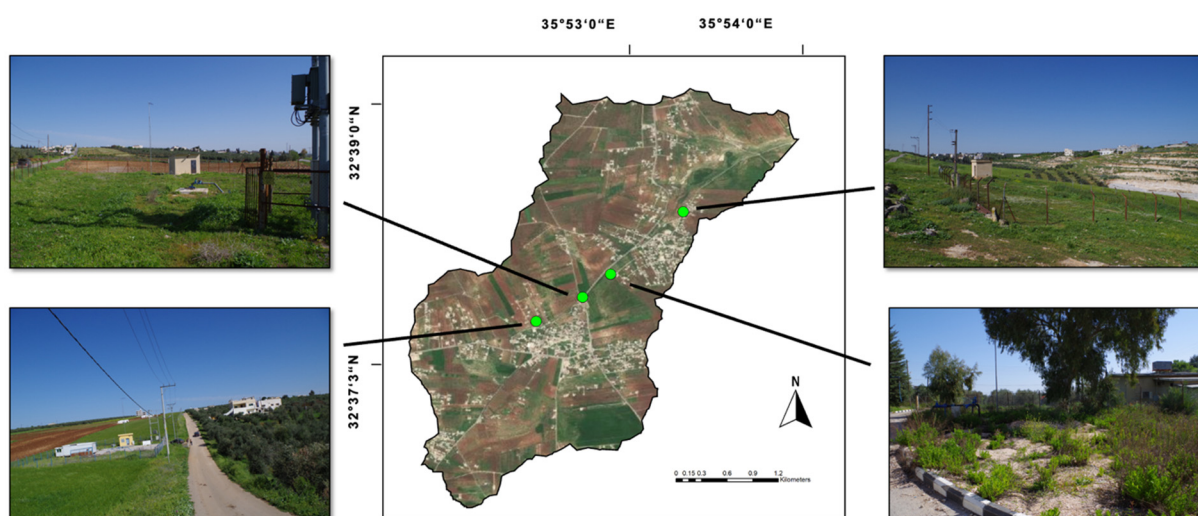

Figure S2. Overview of the study area and pictures of the individual wells in the Harima micro-catchment, May 2021.
